# Supplementary material
Source: MDPI journal article supplement (https://www.mdpi.com/2073-4344/13/2/323)
Supplement: s1 [file s1]

## Supplementary Materials

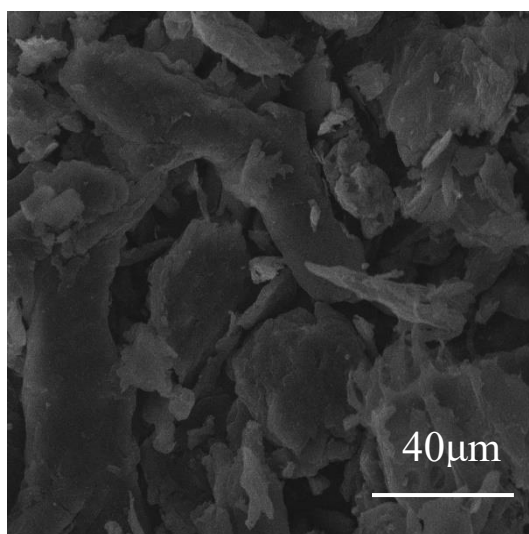

**Figure S1.** The SEM image of WF.

**Table S1.** XRD spectral data of Fe<sub>3</sub>O<sub>4</sub>, WF<sub>20</sub>/Fe<sub>3</sub>O<sub>4</sub> and WFB<sub>20</sub>/Fe<sub>3</sub>O<sub>4</sub> catalysts.

| Sample                                            | Lattice planes | Peak position (2θ) | B; FWHM | Crystallite size (nm) | Average crystallite size (nm) |
|---------------------------------------------------|----------------|--------------------|---------|-----------------------|-------------------------------|
| Fe <sub>3</sub> O <sub>4</sub>                    | (220)          | 30.2               | 0.807   | 11.27                 | 15.33                         |
|                                                   | (311)          | 35.6               | 0.783   | 12.35                 |                               |
|                                                   | (400)          | 43.2               | 0.625   | 17.26                 |                               |
|                                                   | (511)          | 57.1               | 0.925   | 15.65                 |                               |
|                                                   | (440)          | 62.8               | 0.855   | 20.12                 |                               |
| WF <sub>20</sub> /Fe <sub>3</sub> O <sub>4</sub>  | (220)          | 30.2               | 0.782   | 11.63                 | 15.58                         |
|                                                   | (311)          | 35.6               | 0.722   | 13.39                 |                               |
|                                                   | (400)          | 43.2               | 0.703   | 15.34                 |                               |
|                                                   | (511)          | 57.1               | 0.908   | 15.94                 |                               |
|                                                   | (440)          | 62.8               | 0.797   | 21.58                 |                               |
| WFB <sub>20</sub> /Fe <sub>3</sub> O <sub>4</sub> | (220)          | 30.2               | 0.886   | 10.27                 | 13.63                         |
|                                                   | (311)          | 35.6               | 0.767   | 12.61                 |                               |
|                                                   | (400)          | 43.2               | 1.017   | 10.61                 |                               |
|                                                   | (511)          | 57.1               | 0.969   | 14.94                 |                               |
|                                                   | (440)          | 62.8               | 0.872   | 19.73                 |                               |

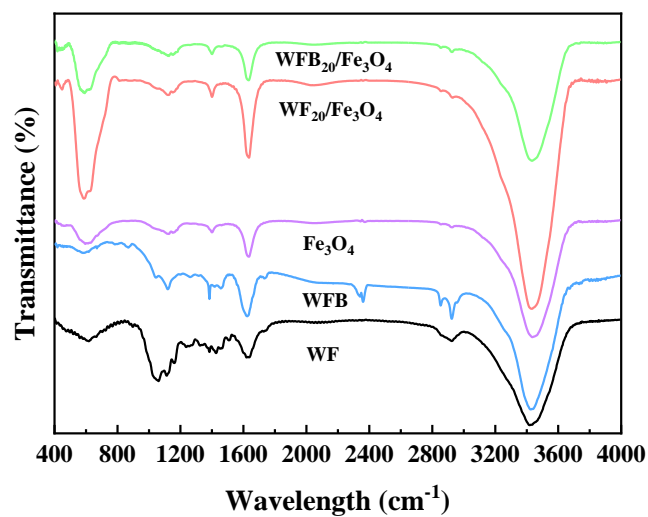

**Figure S2.** FTIR spectra of different catalysts.

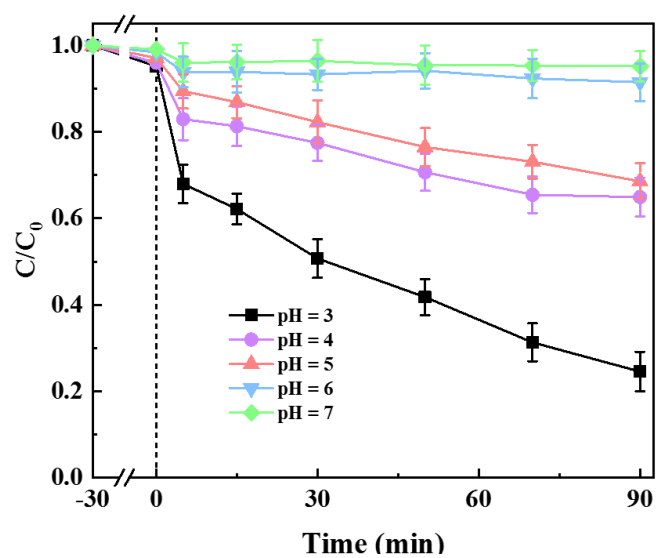

**Figure S3.** Effects of initial solution pH on the degradation of BPA in Fe<sub>3</sub>O<sub>4</sub>-PDS process (conditions: catalyst 1.0 g/L, [PDS]<sub>0</sub> = 5.0 mM, [BPA]<sub>0</sub> = 0.02 mM, pH<sub>0</sub> = 3.00 ± 0.1).

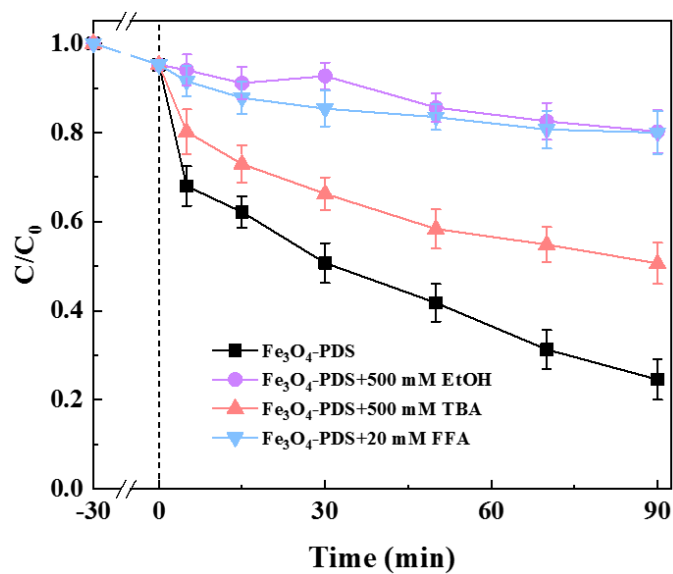

**Figure S4.** Effects of different radical scavengers on BPA degradation in Fe<sub>3</sub>O<sub>4</sub>-PDS system (conditions: catalyst 1.0 g/L, [PDS]<sub>0</sub> = 5.0 mM, [BPA]<sub>0</sub> = 0.02 mM, pH<sub>0</sub> = 3.00 ± 0.1).

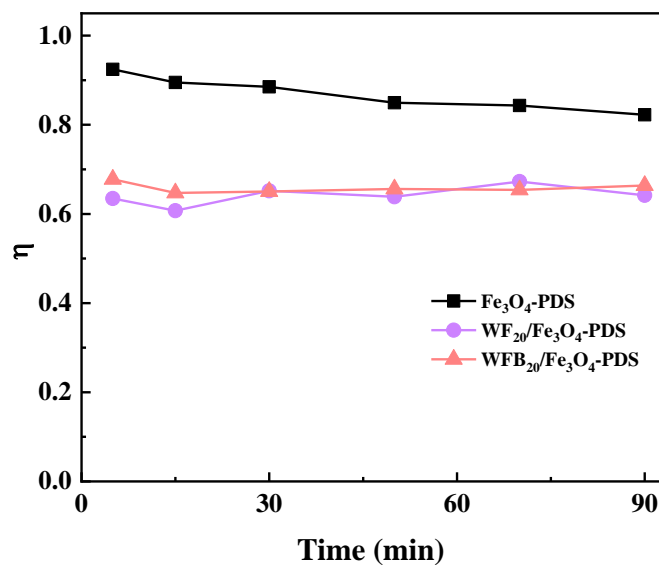

**Figure S5.** The calculated  $\eta$  values ( $\eta = \Delta[\text{PMSO}_2]/\Delta[\text{PMSO}]$ ) in Fe<sub>3</sub>O<sub>4</sub>-PDS, WF<sub>20</sub>/Fe<sub>3</sub>O<sub>4</sub>-PDS and WFB<sub>20</sub>/Fe<sub>3</sub>O<sub>4</sub>-PDS processes (conditions: catalyst 1.0 g/L, [PDS]<sub>0</sub> = 5.0 mM, [PMSO]<sub>0</sub> = 0.5 mM, pH<sub>0</sub> = 3.00 ± 0.1).

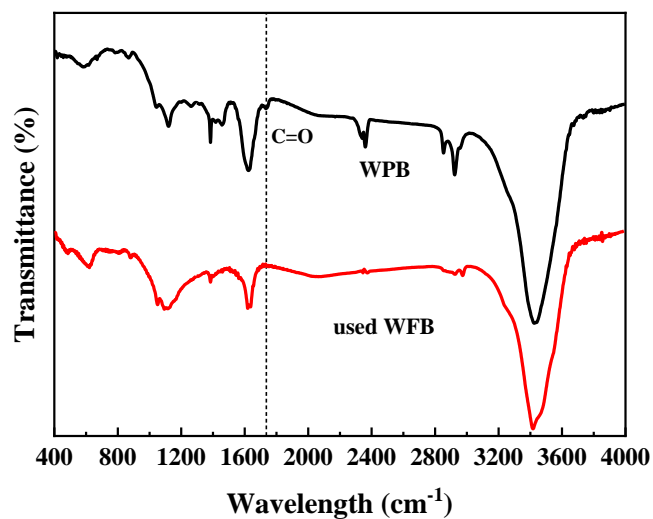

**Figure S6.** FTIR spectra of WFB and used WFB.

**Table S2.** The content of Fe(II) and Fe(III) in different catalysts.

| Sample                                                 | The content of Fe(II) (%) | The content of Fe(III) (%) |
|--------------------------------------------------------|---------------------------|----------------------------|
| Fe <sub>3</sub> O <sub>4</sub>                         | 41.56                     | 58.44                      |
| Used Fe <sub>3</sub> O <sub>4</sub>                    | 36.41                     | 63.59                      |
| WF <sub>20</sub> /Fe <sub>3</sub> O <sub>4</sub>       | 40.00                     | 60.00                      |
| Used WF <sub>20</sub> /Fe <sub>3</sub> O <sub>4</sub>  | 32.32                     | 67.68                      |
| WFB <sub>20</sub> /Fe <sub>3</sub> O <sub>4</sub>      | 37.21                     | 62.79                      |
| Used WFB <sub>20</sub> /Fe <sub>3</sub> O <sub>4</sub> | 32.12                     | 67.88                      |
